# Supplementary material for: Solubility and Thermal Stability of Thermotoga maritima MreB
Source: MDPI journal article supplement (doi:10.3390/ijms232416044), 2022-12-16
Supplement: s1 [file s1]

## Supplementary data

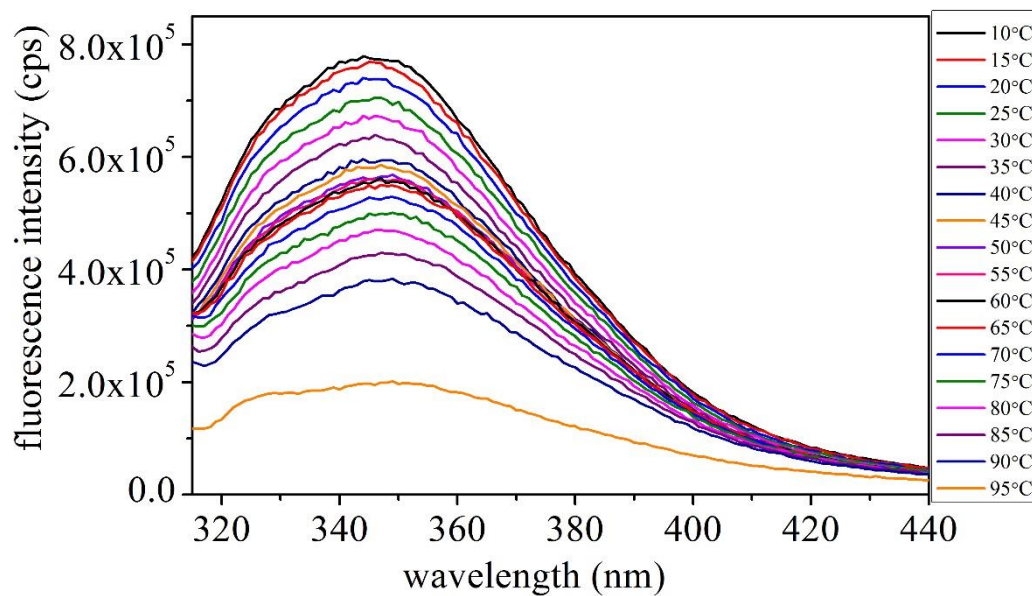

**Figure S1.** Thermal denaturation of *Tm*-MreB. The fluorescence intensity of tryptophan residue decreases upon temperature increases. At melting point there is a drop in fluorescence intensity change. In case of salt free conditions in presence of 2 mM ATP it can be observed at high temperature, between 90-95°C.

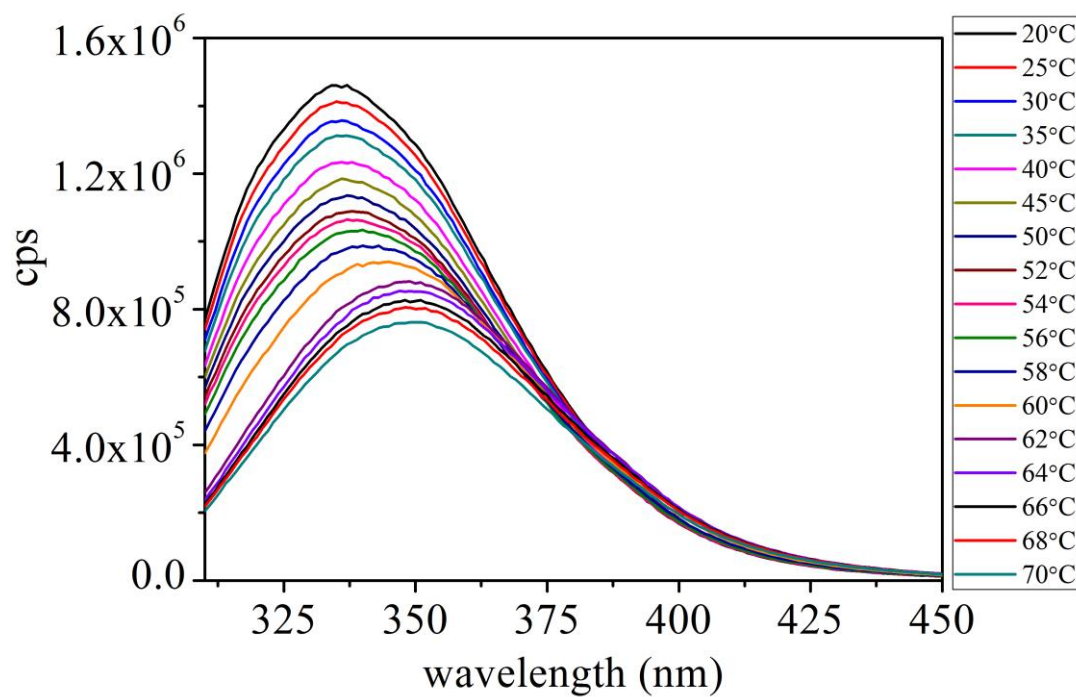

**Figure S2.** Thermal denaturation of rabbit skeletal alpha actin. Actin was investigated in same buffer than *Tm*-MreB. Beside fluorescence intensity decrease there is also a red-shift observed upon melting.

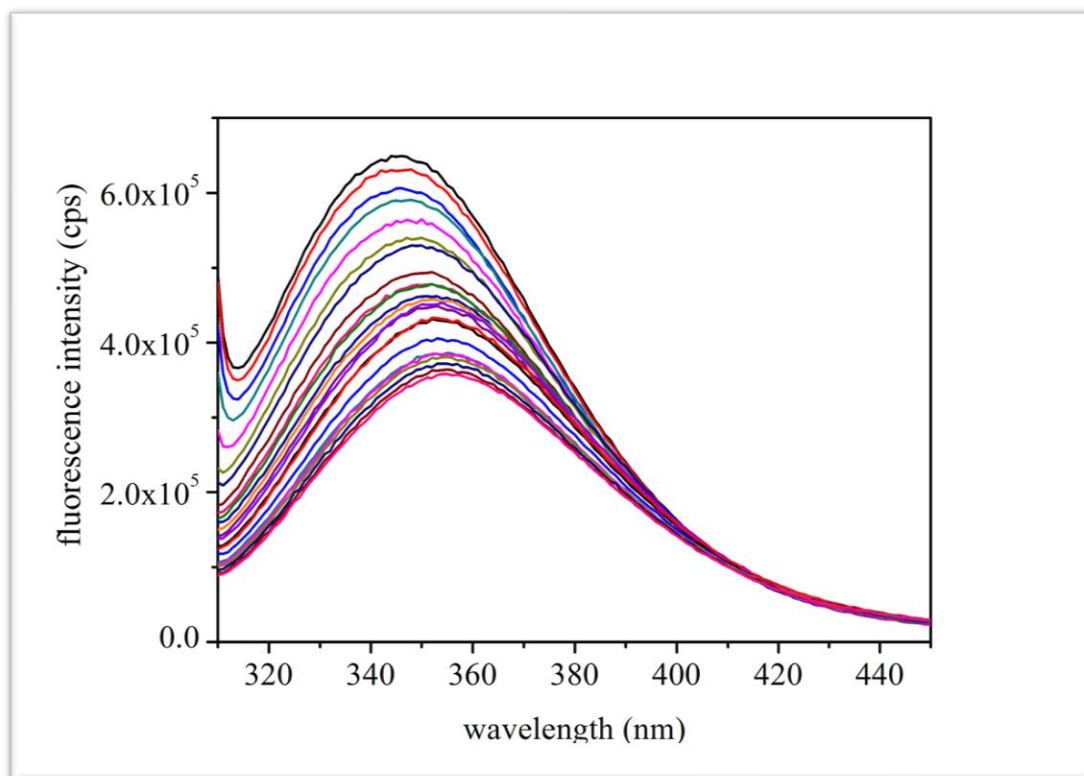

**Figure S3.** Chemical denaturation of *Tm*-MreB. The fluorescence intensity of tryptophan residue decreases upon concentration of Guanidine hydrochloride increases, and a strong red shift can be observed.
